# Supplementary figures and images for: Intrinsic disorder in Viral Proteins Genome-Linked: experimental and predictive analyses
Source: Springer Nature journal article supplement (doi:10.1186/1743-422x-6-23), 2009-01-01

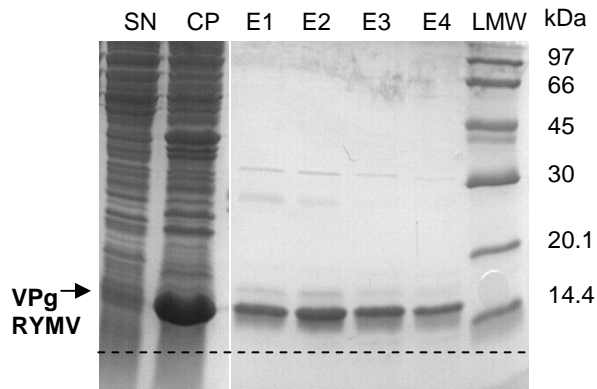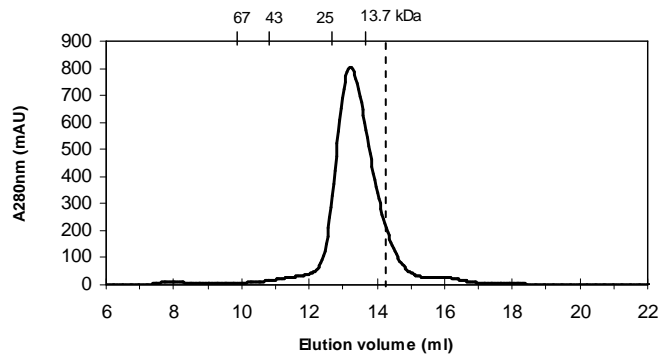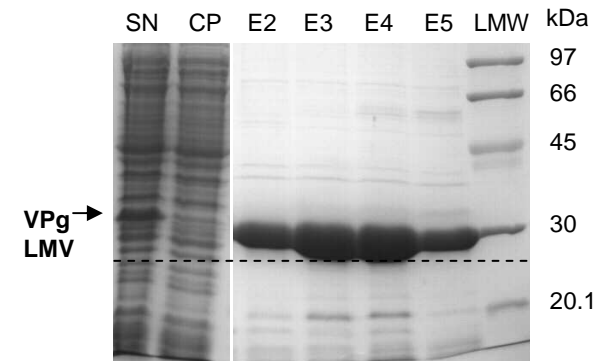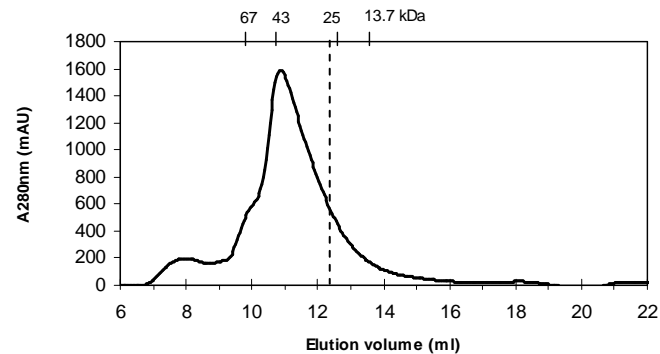

Supplement: 12985_2009_537_MOESM1_ESM.pdf [file 12985_2009_537_MOESM1_ESM.pdf]

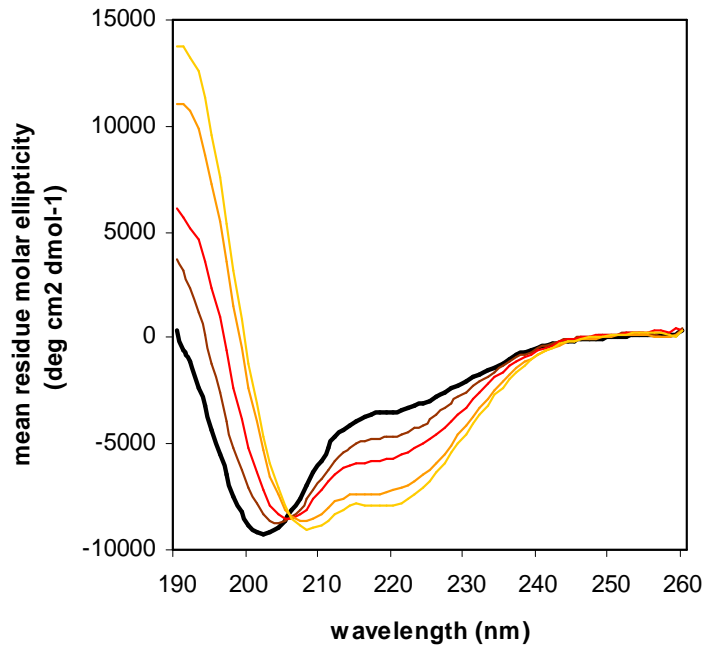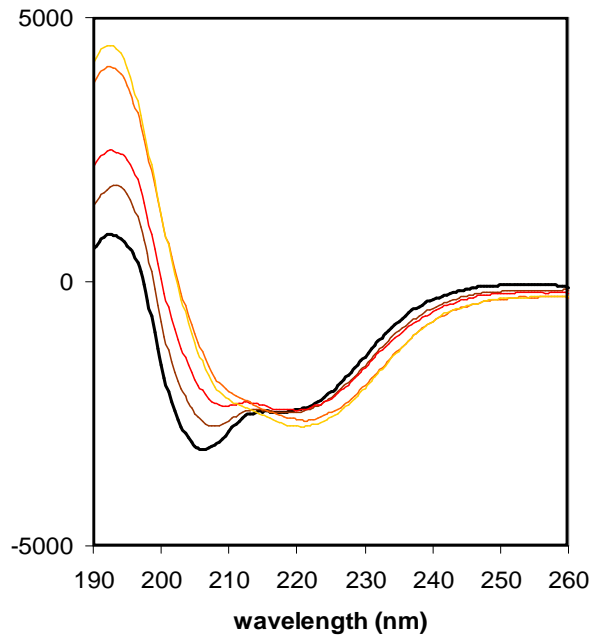

Supplement: 12985_2009_537_MOESM2_ESM.pdf [file 12985_2009_537_MOESM2_ESM.pdf]

**RYMV** 1 79

ee ⇨ ⇨ ee

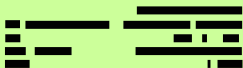

**SeMV** 1 77

⇨ ⇨ ⇨ ⇨

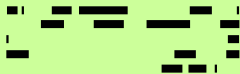

**CoMV** 1 78

eee ⇨⇨ ee

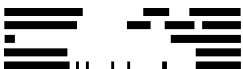

**SBMV** 1 77

⇨ ⇨ ⇨ ⇨

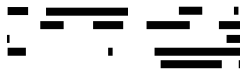

**RGMoV** 1 76

eee ⇨⇨ ee e

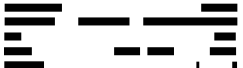

**SCPMV** 1 77

⇨ eee ⇨ e ⇨

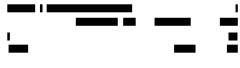

Supplement: 12985_2009_537_MOESM3_ESM.pdf [file 12985_2009_537_MOESM3_ESM.pdf]

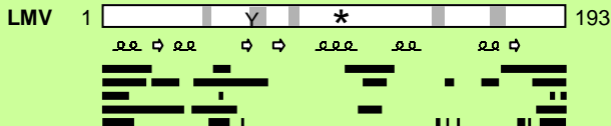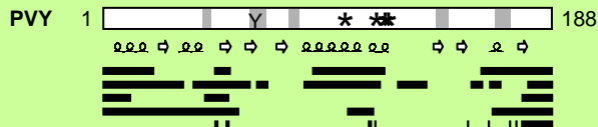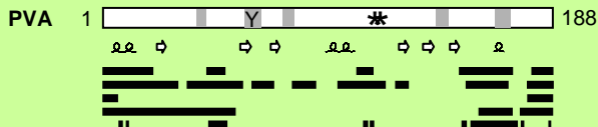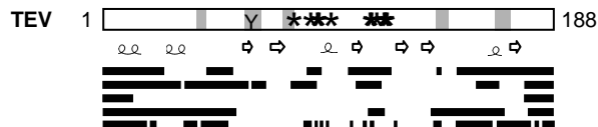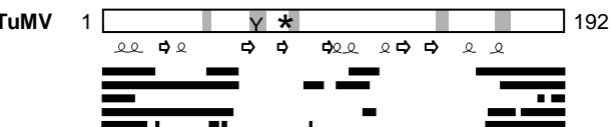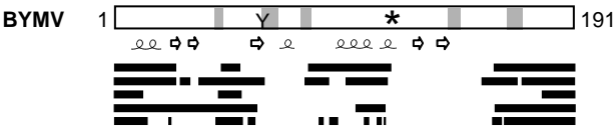

Supplement: 12985_2009_537_MOESM4_ESM.pdf [file 12985_2009_537_MOESM4_ESM.pdf]

RHDV 1 Y 114

⇨ *llll ll* ⇨*l* ⇨ ⇨

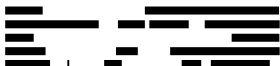

VESV 1 Y 113

⇨ *lllll* ⇨

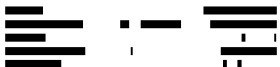

SVMan 1 Y 114

*ll ll lll* ⇨ ⇨

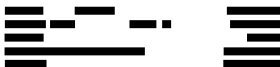

NV 1 Y 138

*ll llll ll ll* ⇨ *l*

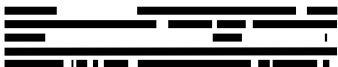

Supplement: 12985_2009_537_MOESM5_ESM.pdf [file 12985_2009_537_MOESM5_ESM.pdf]

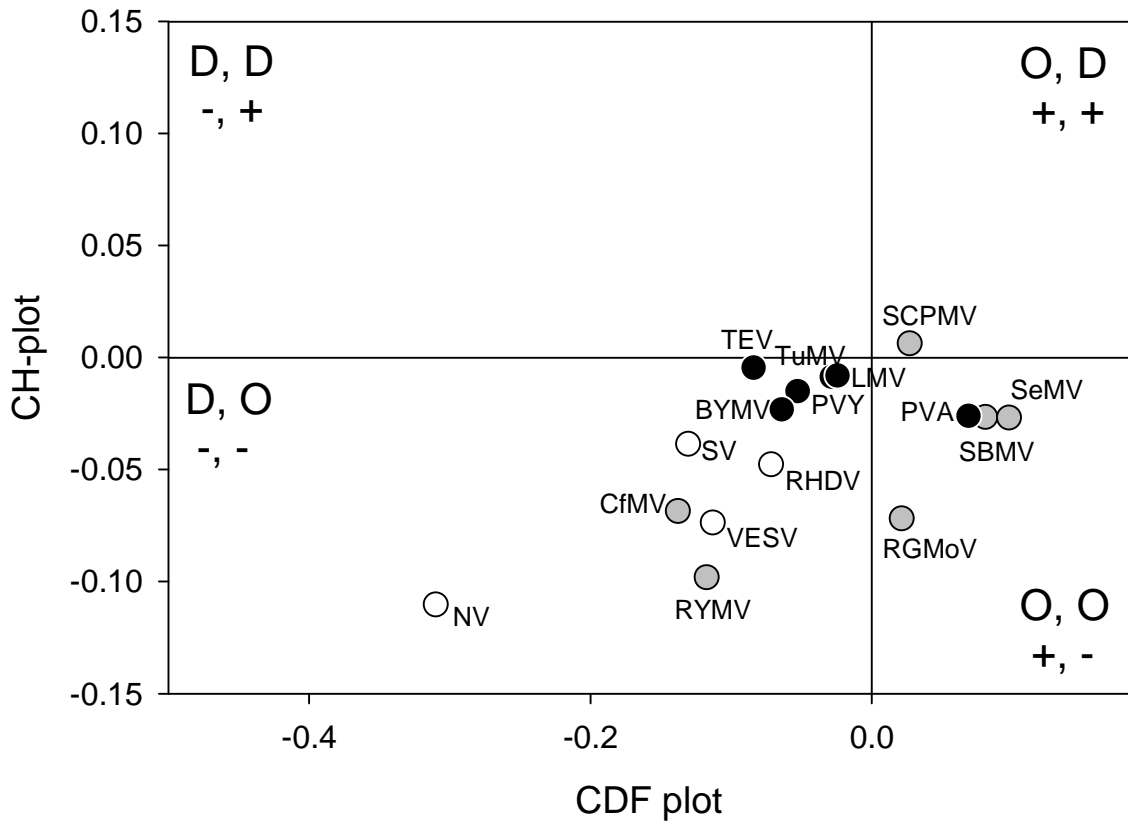

Supplement: 12985_2009_537_MOESM6_ESM.pdf [file 12985_2009_537_MOESM6_ESM.pdf]
